# Supplementary material
Source: publisher figshare collection journal article supplement (https://geolsoc.figshare.com/ndownloader/files/20032493)
Supplement: Supplementary file 1 [file 20032493]

# Version 6.1, post-review
# Requires GCDkit 6.0 or above

#####################################################################
#                                                                   #
#                           Function definitions                    #
#                                                                   #
#####################################################################


################################################
#  
# Graph decorations
#
################################################

# Draw contour lines roughly corresponding to percentile of dataset


improvedKDE2<-function(nudge=1e-5,kderes=NULL,dx=NULL,dy=NULL){
# Version filtered for SiO2
    handle<-WR[,"SiO2"]>62
    n<-50
    if(is.null(kderes)){
        #Limits of the graph
        xrange<-sheet$d$c$xlim
        yrange<-sheet$d$c$ylim
        dx<-(xrange[2]-xrange[1])/n
        dy<-(yrange[2]-yrange[1])/n

        #Call kde funtion
        handle<- !is.na(x.data)&!is.na(y.data)&handle
        kderes<-kde2d(x.data[handle],y.data[handle],n=n,lims=c(xrange, yrange))
    }
    
    # "horizontal" slices, for constant values of the pdf
    zz<-range(kderes$z)

    # Test how much is under the curve for given z values
    propUnderPdf<-function(z,kdemat){
        kdemat[kdemat<z]<-0
        return(dx*dy*sum(kdemat))
    }

    # Draw contours such that x% of the dataset is enclosed
    # (approximative, but probably a good first pass)
    contVals<-c(0.25,0.5,0.75)
    res<-NULL
    for(cv in contVals){
        foo<-function(z){
            return(abs(propUnderPdf(z,kderes$z)-cv))
        }
        ee<-optim(nudge,foo)$par
        res<-c(res,ee)
        contour(kderes$x,kderes$y,kderes$z,levels=ee,add=T,labels=paste(cv*100,"%"),lwd=2,col=paste("gray",cv*100,sep=""))
    }
    invisible(list(kderes=kderes,dx=dx,dy=dy))
}

addLine<-function(xl,yl,lty="solid",lwd=1,col=plt.col[1],redraw=T){
  
  origsheet <- sheet
  my <- list(my = list(
    "lines",
    x = xl,
    y = yl,
    lty=lty,
    lwd=lwd,
    col=col
  ))
  
  ee <- c(origsheet$demo$template, my)
  sheet <- origsheet
  sheet$demo$template <- ee
  
  # Put things back the way they were
  assign("sheet", sheet, .GlobalEnv)
  
  # Redraw, etc.
  if (redraw) {
    figRedraw()
  }
  
  figaroOn()
}

################################################
#  
# LDA functions
#
################################################

lda.GCDkit<-function(varnames,groups,suff){

    colAv<-function(cc){
        ee<-mean(cc,na.rm=T)
        cc[is.na(cc)]<-ee
        return(cc)
    }
    dd<-as.data.frame(WR[,varnames])
    dd.f<-apply(dd,MARGIN=2,FUN=colAv)
    ld<-lda(dd.f,labels[,groups])

    # Make sure the sign of SiO2 is always positive, to ensure consistent graphs
    for(i in (1:ncol(ld$sc))){
        if(ld$scaling[1,i]<0){
        cat("Changing sign of component",i,"\n")
            ld$scaling[,i]<- -ld$scaling[,i]
        }
    }
    
    ee<-predict(ld)$x
    colnames(ee)<-paste(colnames(ee),suff,sep="_")
    results<<-ee
    addResults(GUI=F)

return(ld)
}

################################################
#  
# ACF projection (mol.%)
#
################################################
# (White 1990 Workshop Notes)

ACF<-function(){
    if(!getOption("gcd.plot.bw")){
        col1<-plt.col[3]
        col2<-plt.col[2]
    }else{
        col1<-"black"
        col2<-"black"
    }
    z<-matrix(NA,nrow=nrow(WR),ncol=3)
    z[,1]<-WR[,"CaO"]/MW["CaO"]-3.3*WR[,"P2O5"]/MW["P2O5"]
    z[,2]<-WR[,"Al2O3"]/MW["Al2O3"]*2-WR[,"Na2O"]/MW["Na2O"]*2-WR[,"K2O"]/MW["K2O"]*2
    z[,3]<-WR[,"MgO"]/MW["MgO"]+WR[,"FeOt"]/MW["FeO"]
    colnames(z)<-c("C.White","A.White","F.White")
    rownames(z)<-rownames(WR)
    
    suma<-apply(z,1,sum)
    aa<-z[,1]/suma
    bb<-z[,2]/suma
    cc<-z[,3]/suma
   
    x.data<<-round(cc+bb/2,4)
    y.data<<-round(sqrt(3)*bb/2,4)
    #paste(x.data,collapse=",")
    #paste(y.data,collapse=",")

    temp<-list(
        # Lines
        lines0=list("lines",x=c(0,1,.5,0),y=c(0,0,sqrt(3)/2,0),col="black"),
        
        lines1=list("lines",x=c(0.3333,0.9394,0.876,0.3333),y=c(0.5773,0.1049,0.2147,0.5773),col="saddlebrown"),
        lines2=list("lines",x=c(0.9394,0.6636,0.6845,0.9394),y=c(0.1049,0.0985,0.0715,0.1049),col="seagreen"),
        lines3=list("lines",x=c(0.664,0.3333),y=c(0.0985,0.5773),col="black"),
        lines4=list("lines",x=c(0.3333,0.6667),y=c(0.5774,0.5774),col="black",lty="dashed"), # Pl-Crd
        lines5=list("lines",x=c(0.3333,0.5296),y=c(0.5774,0.8147),col="black",lty="dashed"), # Pl-Ms
        lines6=list("lines",x=c(0.876,0.9394),y=c(0.2147,0.1049),col="saddlebrown",lwd=5), # Biotite 
        lines7=list("lines",x=c(0.6636,0.6845),y=c(0.0985,0.0715),col="seagreen",lwd=5),    # Hornblende
        
        # Points
        points1=list("points",x=0.5296,y=0.8147,col="red",pch=15,cex=1),     # Muscovite, White (1990) 
        points2=list("points",x=0.3333,y=0.5774,col="darkred",pch=15,cex=1), # An
        points3=list("points",x=0.3333,y=0.5774,col="purple3",pch=15,cex=1), # Crd 
        
        # Apices
        A=list("text",x=0,y=-0.03,text=annotate("Ca-1.67*P"),adj=0.5),
        B=list("text",x=0.5,y=sqrt(3)/2+.03,text=annotate("Al-Na-K"),adj=0.5),
        C=list("text",x=1,y=-0.03,text=annotate("Fet+Mg"),adj=0.5),
        
        GCDkit=list("NULL",plot.type="ternary",plot.position=204.85,plot.name="ACF projection (mol. %) White (1990)")
    )

    if(getOption("gcd.plot.text")){
        temp<-c(temp,list(
            text1=list("text",x=0.53,y=0.82,text=" Ms",col="red",cex=1,pos=4,adj=0),
            text2=list("text",x=0.905,y=0.17,text=" Bt",col="saddlebrown",cex=1,pos=4,adj=0),
            text3=list("text",x=0.66,y=0.086,text="Hbl",col="seagreen",cex=1,pos=2,adj=1),
            text4=list("text",x=0.33,y=0.58,text="An ",col="darkred",cex=1,pos=2,adj=1),
            text5=list("text",x=0.664,y=0.58,text=" Crd",col="purple3",cex=1,pos=4,adj=0),
            
            # Texts annotating the main fields
            text6=list("text",x=0.7,y=0.22,text="I",col=col1),   # Hbl-bearing granites
            text7=list("text",x=0.81,y=0.23,text="II",col=col1), # Bt-only granites
            text8=list("text",x=0.56,y=0.55,text="III",col=col1) # Ms-, Crd-, Grt- and And-bearing granites   
        ))
    }

    sheet<<-list(demo=list(fun="plot",
                       call=list(xlim=c(-.03,1.03),
                                 ylim=c(-0.08,1.03),
                                 main=annotate("ACF projection (mol. %) White (1990)"),
                                 bg="transparent",
                                 fg="black",
                                 asp=1,
                                 axes=F,
                                 type="p",
                                 xlab="",
                                 ylab=""),
                       template=temp))  
}


#####################################################################
#                                                                   #
#                     Entry point                                   #
#                                                                   #
#####################################################################

# Adapt the following line to the path to the data file
setwd("C:\\Users\\moje4671\\Documents\\Recherche\\Global_Geochem\\granite_class\\work")

library(MASS)
# Adapt the following line to the name of the data file
loadData("Bonin ESM1 dataset R1.txt")

pokeDataset("original_data")

################################################
#  
# Screening for obviously bad analyses
#
################################################
 
#3050 lines
# Filtering on total
# Takes into account the possibility of more or less oxidized compo

ee <- calcCore("SiO2+TiO2+Al2O3+FeOt+MgO+MnO+CaO+K2O+Na2O+P2O5")
Total1<-ee$results
WR <<- cbind(WR, Total1)
        
ee <- calcCore("SiO2+TiO2+Al2O3+FeOt*1.111+MgO+MnO+CaO+K2O+Na2O+P2O5") #Fe2O3
Total2<-ee$results
WR <<- cbind(WR, Total2)

#We start with n = 2448
selectSubset("SiO2<80",save=TRUE) #Clearly bogus (n = 3048)
selectSubset("SiO2>52",save=TRUE) #intermediate and above (n = 3011)
# Total1 (FeO) should be lower than Total2, a conservative estimate is 
# to use Total1 as a upper bound (i.e. all Fe is reduced, this is the smallest sum possible, 
# so if it is too high it is really bad !)
# and total2 as an lower bound by the same logic.
selectSubset("Total2>98",save=TRUE) #(n = 2580)
selectSubset("Total1<102",save=TRUE) #(n = 2576)

################################################
#  
# Various transformations of data
#
################################################

mjr.names.full<-c("SiO2","TiO2","Al2O3","FeOt","MgO","MnO","CaO","K2O","Na2O","P2O5")
mjr.names.small<-c("SiO2","TiO2","Al2O3","FeOt","MgO","CaO","K2O","Na2O")

# clr_sm, small set of oxd
clr.trans(mjr.names.small)
colnames(results)<-paste(colnames(results),"sm",sep="_")
addResults()

# millications
millications(WR,print=F,save=TRUE)
mcats<-results
addResults()

# Mesonorm
meso<-Mesonorm(WR)
addResults(GUI=F)

#CIPW
#ee<-CIPW(WR)

#alpha param (from A/CNK)
ee <- calcCore("(Al.m-Na.m-K.m)/Ca.m")
alpha <- ee$results
WR <<- cbind(WR, alpha)

# LDA
ld_clr2<-lda.GCDkit(paste(mjr.names.small,"clr_sm",sep="_"),"Group","clr2")

################################################
#  
# Grouping
#
################################################

# Labels orderered in the right order, tweak names
groups<-ordered(labels$Group,levels=c("2- Archaean TTG","3- RTG","4- ACG & ATG","1- CPG & MPG","5- KCG","6-PAG and syenites"),
labels=c("Archaean","Ridge tholeiitic (RTG)","(Amph.) calc-alk. (ACG & ATG)","Peral. (CPG & MPG)","K-rich calc-alk. (KCG)","Alk. and peralk. (PAG)"))


################################################
#  
# Ready to go !
#
################################################

pokeDataset("clean_data")


################################################
#  
# Figure 8 - multiple plots + grn min
#
################################################
peekDataset("clean_data")
setTransparency(transp=0.6)
multiplePerPage(which=4,nrow=2,ncol=2,title=NULL)

binary("SiO2","MgO",xmin=50,xmax=80,ymax=6,new=F)
binary("SiO2","K2O",xmin=50,xmax=80,ymax=6,new=F)
plotDiagram("Villaseca",F,F, main=" ")
plotDiagram("QANOR",F,F,mesonorm=meso)

figCex(1.2)
plateCexLab(1.3)
plateAnnotationsRemove()
plateLabelSlots("letters","()",pos="topleft",cex=1.42)

plateRedraw()

Plate(1)
improvedKDE2()

Plate(2)
improvedKDE2(nudge=1e-4) # Nudge is initial guess for optim, sometimes need some tweaking.

Plate(3)
improvedKDE2()

Plate(4)
improvedKDE2()


################################################
#  
# Figure 9 - LDA
#
################################################
peekDataset("clean_data")

#ld_clr2<-lda.GCDkit(paste(mjr.names.small,"clr_sm",sep="_"),"Group","clr2")
setTransparency(transp=0.6)

multiplePerPage(4,nrow=2,ncol=2,title="")
    binary("LD1_clr2","LD2_clr2",new=F,xlab="LD1",ylab="LD2",xmin=-7,xmax=5,ymin=-6,ymax=6)
    binary("LD1_clr2","LD2_clr2",new=F,xlab="LD1",ylab="LD2",xmin=-7,xmax=5,ymin=-6,ymax=6)
    
    binary("LD1_clr2","LD3_clr2",new=F,xlab="LD1",ylab="LD3",xmin=-7,xmax=5,ymin=-3,ymax=4)
    binary("LD1_clr2","LD3_clr2",new=F,xlab="LD1",ylab="LD3",xmin=-7,xmax=5,ymin=-3,ymax=4)

    plateCexLab(1.6)

    plateRedraw()
    
    Plate(1)
    improvedKDE2(nudge=0.01)
    abline(h=0)
    abline(v=0)
    
    Plate(2)
    improvedKDE2(nudge=0.01)
    figCex(0)
    abline(h=0)
    abline(v=0)
    arrows(x0=rep(0,nrow(ld_clr2$scaling)),y0=rep(0,nrow(ld_clr2$scaling)),x1=ld_clr2$scaling[,1],y1=ld_clr2$scaling[,2],lwd=2)
    text(ld_clr2$scaling[,1],ld_clr2$scaling[,2],annotate(rownames(ld_clr2$scaling)))

    Plate(3)
    improvedKDE2(nudge=0.1)
    abline(h=0)
    abline(v=0)
    
    Plate(4)
    improvedKDE2(nudge=0.1)
    figCex(0)
    abline(h=0)
    abline(v=0)
    arrows(x0=rep(0,nrow(ld_clr2$scaling)),y0=rep(0,nrow(ld_clr2$scaling)),x1=ld_clr2$scaling[,1],y1=ld_clr2$scaling[,3],lwd=2)
    text(ld_clr2$scaling[,1],ld_clr2$scaling[,3],annotate(rownames(ld_clr2$scaling)))


# Manual assembly in Illustrator...
windows()
boxplot(WR[,"LD1_clr2"] ~ factor(labels[,"Group"]), ylab = "", xlab = "", 
    varwidth = FALSE,cex.axis = 0.7, col = "lightgreen", 
    horizontal = TRUE, xaxs = "i", yaxs = "i", sub = annotate(selected),ylim=c(-7,5))
    
windows()
boxplot(WR[,"LD2_clr2"] ~ factor(labels[,"Group"]), ylab = "", xlab = "", 
    varwidth = FALSE,cex.axis = 0.7, col = "lightgreen", 
    horizontal = FALSE, xaxs = "i", yaxs = "i", sub = annotate(selected),ylim=c(-6,6))  

windows()
boxplot(WR[,"LD3_clr2"] ~ factor(labels[,"Group"]), ylab = "", xlab = "", 
    varwidth = FALSE,cex.axis = 0.7, col = "lightgreen", 
    horizontal = FALSE, xaxs = "i", yaxs = "i", sub = annotate(selected),ylim=c(-3,4))  

        
################################################
#  
# SE1 - 3D LDA
#
################################################

require("rgl")|| stop("rgl package not installed")

x.data<-WR[,"LD1_clr2"]
y.data<-WR[,"LD2_clr2"]
z.data<-WR[,"LD3_clr2"]

spheres<-labels[,"Symbol"]==16
cubes<-labels[,"Symbol"]==15
tetra<-labels[,"Symbol"]==17
octa<-labels[,"Symbol"]==18
others<-labels[,"Symbol"]==3|labels[,"Symbol"]==8

open3d()

material3d(size=5)

rgl::decorate3d(c(-7,5),c(-7,5),c(-7,5), xlab = "LD1", ylab = "LD2", zlab = "LD3",aspect=TRUE)

rgl.spheres(x.data[spheres],y.data[spheres],z.data[spheres],r=0.2,col=labels[spheres,"Colour"])
shapelist3d(cube3d(),x.data[cubes],y.data[cubes],z.data[cubes],size=0.15,color=labels[cubes,"Colour"])
shapelist3d(tetrahedron3d(),x.data[tetra],y.data[tetra],z.data[tetra],size=0.2,color=labels[tetra,"Colour"])
shapelist3d(octahedron3d(),x.data[octa],y.data[octa],z.data[octa],size=0.25,color=labels[octa,"Colour"])
shapelist3d(icosahedron3d(),x.data[others],y.data[others],z.data[others],size=0.15,color=labels[others,"Colour"])

# Vectors
vect<-ld_clr2$scaling[,1:3]

x.data<-vect[,1]
y.data<-vect[,2]
z.data<-vect[,3]

xs.data<-as.vector(t(cbind(0,x.data)))
ys.data<-as.vector(t(cbind(0,y.data)))
zs.data<-as.vector(t(cbind(0,z.data)))

rgl::segments3d(xs.data,ys.data,zs.data,col="black",lwd=5)
rgl::text3d(x.data,y.data,z.data,text=sub("_clr_sm","",rownames(vect)),col="black")

writeWebGL(dir=getwd(),filename="Bonin_etal_SE1_LDAplot3D.html",snapshot=T,width=600)

################################################
#  
# Fig. 10 - LDA meaning
#
################################################

peekDataset("clean_data")

assignColVar("LD1_clr2",pal="jet.colours",quant=1,eq.classes=TRUE,alt.leg=TRUE)
pokeDataset("LD1col",overwrite.warn=FALSE)
showLegend(alt.leg = TRUE, just.colours = TRUE)

assignColVar("LD2_clr2",pal="jet.colours",quant=1,eq.classes=TRUE,alt.leg=TRUE)
pokeDataset("LD2col",overwrite.warn=FALSE)
showLegend(alt.leg = TRUE, just.colours = TRUE)

assignColVar("LD3_clr2",pal="jet.colours",quant=1,eq.classes=TRUE,alt.leg=TRUE)
pokeDataset("LD3col",overwrite.warn=FALSE)
showLegend(alt.leg = TRUE, just.colours = TRUE)

multiplePerPage(which=4,nrow=2,ncol=2,title="")

peekDataset("LD1col")
setTransparency(transp=0.6)
plotDiagram("QANOR",F,F,main=" ",mesonorm=meso)
plotDiagram("DebonPQ",F,F,main=" ")

peekDataset("LD2col")
setTransparency(transp=0.6)
Plate(3)
plotDiagram("Villaseca",F,F,main=" ")

peekDataset("LD3col")
setTransparency(transp=0.6)
Plate(4)
plotDiagram("DebonBMgNo",F,F,main=" ")

plateCexLab(1.3)
plateAnnotationsRemove()
plateLabelSlots("letters","()",pos="topright",cex=1.42)
plateRedraw()

################################################
#  
# Fig. 11 - 14
# Fig. SE 4 - 13
#
################################################

peekDataset("clean_data")
setTransparency(transp=0.4)

# Fig. 11
plotDiagram("QANOR",F,T,mesonorm=meso)
figRemove()
figCexLab(1.5)
figCexMain(1.7)
ee<-improvedKDE2()

figMulti(nrow=2,ncol=3)
plateLabelSlots("letters","()",pos="topright",cex=2)
plateRedraw()

for(i in 1:6){
    Plate(i)
    improvedKDE2(kderes=ee$kderes,dx=ee$dx,dy=ee$dy)
}


# Fig. 12
plotDiagram("DebonPQ",F,T)
# Answer "no" when asked whether to fix coordinates
figRemove()
figCexLab(1.5)
figCexMain(1.7)
ee<-improvedKDE2()

figMulti(nrow=2,ncol=3)
plateLabelSlots("letters","()",pos="topleft",cex=2)
plateRedraw()

for(i in 1:6){
    Plate(i)
    improvedKDE2(kderes=ee$kderes,dx=ee$dx,dy=ee$dy)
}

# Fig. 13
plotDiagram("Villaseca",F,T)
# Answer "no" when asked whether to fix coordinates
figYlim(c(-100,100))
figRemove()
figCexLab(1.5)
figCexMain(1.7)
ee<-improvedKDE2()

figMulti(nrow=2,ncol=3)
plateLabelSlots("letters","()",pos="topright",cex=2)
plateRedraw()

for(i in 1:6){
    Plate(i)
    improvedKDE2(kderes=ee$kderes,dx=ee$dx,dy=ee$dy)
}

# Fig. 14
plotDiagram("DebonBMgNo",F,T)
# Answer "no" when asked whether to fix coordinates
figXlim(c(0,250))
figYlim(c(0,0.7))

figRemove()
figCexLab(1.5)
figCexMain(1.7)
ee<-improvedKDE2()

figMulti(nrow=2,ncol=3)
plateLabelSlots("letters","()",pos="topright",cex=2)
plateRedraw()
for(i in 1:6){
    Plate(i)
    improvedKDE2(kderes=ee$kderes,dx=ee$dx,dy=ee$dy)
}

#### ESM #####
# Fig. SE4

plotDiagram("projbioplot",F,T,xmin=-1.5,xmax=1.3)
# Answer "no" when asked whether to fix coordinates

figRemove()
figCexLab(1.5)
figCexMain(1.7)
ee<-improvedKDE2()

figMulti(nrow=2,ncol=3)
plateLabelSlots("letters","()",pos="topright",cex=1.8)
plateRedraw()
for(i in 1:6){
    Plate(i)
    improvedKDE2(kderes=ee$kderes,dx=ee$dx,dy=ee$dy)
}

# Fig. SE5
binary("SiO2","alpha",xmin=55,xmax=80,ymin=-2,ymax=6)
addLine(c(55,80),c(1,1),lty="dashed",col="black")
addLine(c(55,80),c(2,2),lty="dashed",col="black")
figRemove()
figCexLab(1.5)
figCexMain(1.7)
ee<-improvedKDE2()

figMulti(nrow=2,ncol=3)
plateLabelSlots("letters","()",pos="topleft",cex=1.8)
plateRedraw()

for(i in 1:6){
    Plate(i)
    improvedKDE2(kderes=ee$kderes,dx=ee$dx,dy=ee$dy)
}


# Fig. SE6
plotDiagram("OConnorPlut",F,T,ab="Ab",or="Or",an="An")

sheet$demo$call$ylim<-c(-3,40)
sheet$demo$call$xlim<-c(-3,70)
figRedraw()

figRemove()
figCexLab(1.5)
figCexMain(1.7)
ee<-improvedKDE2()

figMulti(nrow=2,ncol=3)
plateLabelSlots("letters","()",pos="topleft",cex=1.8)
plateRedraw()

for(i in 1:6){
    Plate(i)
    improvedKDE2(kderes=ee$kderes,dx=ee$dx,dy=ee$dy,nudge=1e-4)
}

# Fig. SE7
plotDiagram("TASMiddlemostPlut",F,T)
figXlim(c(50,80))
figYlim(c(3,12))
figRemove()
figCexLab(1.5)
figCexMain(1.7)
ee<-improvedKDE2()

figMulti(nrow=2,ncol=3)
plateLabelSlots("letters","()",pos="topleft",cex=1.8)

plateRedraw()

for(i in 1:6){
    Plate(i)
    improvedKDE2(kderes=ee$kderes,dx=ee$dx,dy=ee$dy,nudge=1e-6)
}

# Fig. SE8
plotDiagram("Shand",F,T)
# Answer "no" when asked whether to fix coordinates

figXlim(c(0.7,1.5))
figYlim(c(0.7,3.5))
figRemove()
figCexLab(1.5)
figCexMain(1.7)
ee<-improvedKDE2()

figMulti(nrow=2,ncol=3)
plateLabelSlots("letters","()",pos="topleft",cex=1.8)
plateRedraw()


for(i in 1:6){
    Plate(i)
    improvedKDE2(kderes=ee$kderes,dx=ee$dx,dy=ee$dy)
}

# Fig. SE9
plotDiagram("LarochePlut",F,T)
# Answer "no" when asked whether to fix coordinates
figXlim(c(500,3200))
figYlim(c(200,1600))
figRemove()
figCexLab(1.5)
figCexMain(1.7)
ee<-improvedKDE2()

figMulti(nrow=2,ncol=3)
plateLabelSlots("letters","()",pos="topleft",cex=1.8)
plateRedraw()


for(i in 1:6){
    Plate(i)
    improvedKDE2(kderes=ee$kderes,dx=ee$dx,dy=ee$dy)
}

#Fig. SE10
plateExtract("Frost",2,main=" ") # SiO2 - MALI
figRemove()
figCexLab(1.5)
figCexMain(1.7)
ee<-improvedKDE2()

figMulti(nrow=2,ncol=3)
plateLabelSlots("letters","()",pos="topleft",cex=1.8)
plateRedraw()

for(i in 1:6){
    Plate(i)
    improvedKDE2(kderes=ee$kderes,dx=ee$dx,dy=ee$dy,nudge=1e-6)
}

#Fig. SE11
plateExtract("Frost",1,main=" ") # SiO2 - Fe number
figYlim(c(0.4,1))
figRemove()
figCexLab(1.5)
figCexMain(1.7)
ee<-improvedKDE2()

figMulti(nrow=2,ncol=3)
plateLabelSlots("letters","()",pos="topleft",cex=1.8)
plateRedraw()

for(i in 1:6){
    Plate(i)
    improvedKDE2(kderes=ee$kderes,dx=ee$dx,dy=ee$dy)
}

#Fig. SE12
plotDiagram("ACF",F,T)
# Answer "no" when asked whether to fix coordinates

figRemove()
figCexLab(1.5)
figCexMain(1.7)

figMulti(nrow=2,ncol=3)
plateLabelSlots("letters","()",pos="topleft",cex=1.8)
plateRedraw()

#Fig. SE13
plotDiagram("PeceTaylor",F,T)
# Answer "no" when asked whether to fix coordinates

figXlim(c(52,78))
figRemove()
figCexLab(1.5)
figCexMain(1.7)

figMulti(nrow=2,ncol=3)
plateLabelSlots("letters","()",pos="topleft",cex=1.8)
plateRedraw()
